# Supplementary material for: PerLE: An “Open Source”, ELearning Moodle-Based, Platform. A Study of University Undergraduates’ Acceptance
Source: MDPI journal article supplement (doi:10.3390/bs8070063), 2018-07-16
Supplement: s1 [file s1]

# PerLE: an open source eLearning Moodle-based platform. A study of university undergraduates' acceptance

## Appendix A. Questionnaire used in the study

A seven-point Likert scale was used to answer the questions of the proposed constructs:

1 = In completo disaccordo; 2 = Abbastanza in disaccordo; 3 = Poco in disaccordo; 4 = Neutrale; 5 = Poco d'accordo; 6 = Abbastanza d'accordo; 7 = Completamente d'accordo.

| Item                       | Statement                                                                                                               | Reference                                    |
|----------------------------|-------------------------------------------------------------------------------------------------------------------------|----------------------------------------------|
| Technical Support (TS)     |                                                                                                                         |                                              |
| TS1                        | In caso di problemi tecnici su PerLE, si possono fare richieste al personale addetto durante l'orario di ricevimento    | Items adapted from Sánchez and Hueros (2010) |
| TS2                        | In caso di problemi tecnici su PerLE, si possono inviare richieste via e-mail                                           |                                              |
| TS3                        | In caso di problemi tecnici su PerLE, si possono inviare richieste di aiuto tramite i servizi della piattaforma         |                                              |
| TS4                        | Gli amministratori dell'ambiente didattico PerLE offrono un buon supporto tecnico                                       |                                              |
| PerLE User Interface (PUI) |                                                                                                                         |                                              |
| PUI1                       | Il primo impatto con la “Home page” (pagina principale) dell’ambiente didattico PerLE è positivo                        | Items adapted from Liu et al. (2010)         |
| PUI2                       | Sia il design che la grafica dell’ambiente didattico PerLE sono facili da comprendere e interpretare                    |                                              |
| PUI3                       | Il menu dei comandi rispecchia bene la struttura dell’ambiente didattico PerLE                                          |                                              |
| PUI4                       | Il significato del testo e delle icone dell’ambiente didattico PerLE è chiaro                                           |                                              |
| PUI5                       | In generale, sono soddisfatto per il design dell’interfaccia dell’ambiente didattico PerLE                              |                                              |
| PUI6                       | In generale, sono contento di interagire con l’interfaccia utente dell’ambiente didattico PerLE                         |                                              |
| Online Course Lesson (OCL) |                                                                                                                         |                                              |
| OCL1                       | Il materiale di studio presente nell’ambiente didattico PerLE è interessante e stimolante                               | Items adapted from Sánchez and Hueros (2010) |
| OCL2                       | Il materiale di studio presente nell’ambiente didattico PerLE agevola il mio apprendimento                              |                                              |
| OCL3                       | Il materiale di studio presente nell’ambiente didattico PerLE soddisfa le mie esigenze di studio                        |                                              |
| OCL4                       | I materiali educativi presenti nell’ambiente didattico PerLE usano tecnologie innovative                                |                                              |
| OCL5                       | In generale, sono soddisfatto del design e della qualità del materiale di studio presente nell’ambiente didattico PerLE |                                              |
| PerLE Usefulness (PU)      |                                                                                                                         |                                              |
| PUI1                       | L’ambiente didattico PerLE mi aiuta ad apprendere in modo più efficiente                                                | Items adapted from Sánchez and Hueros (2010) |
| PUI2                       | L’ambiente didattico PerLE migliora la mia performance accademica                                                       |                                              |
| PUI3                       | L’ambiente didattico PerLE rende il mio apprendimento più efficace                                                      |                                              |
| PUI4                       | L’ambiente didattico PerLE rende il mio apprendimento più semplice                                                      |                                              |
| PUI5                       | L’ambiente didattico PerLE mi permette di avere più controllo sul mio apprendimento                                     |                                              |
| PUI6                       | Complessivamente, l’ambiente didattico PerLE è vantaggioso per il mio apprendimento                                     |                                              |
| PerLE Ease of Use (PEU)    |                                                                                                                         |                                              |
| PEU1                       | Imparare ad utilizzare l’ambiente didattico PerLE è semplice per me                                                     |                                              |

|                          |                                                                                        |                                                                        |
|--------------------------|----------------------------------------------------------------------------------------|------------------------------------------------------------------------|
| PEU2                     | È facile reperire i contenuti educativi presenti nell'ambiente didattico PerLE         | Items adapted from Abdullah et al. (2016) and Porter and Donthu (2006) |
| PEU3                     | Le modalità di utilizzo dell'ambiente didattico PerLe sono chiare e comprensibili      |                                                                        |
| PEU4                     | Complessivamente, credo che utilizzare l'ambiente didattico PerLE sia semplice         |                                                                        |
| PerLE System Usage (PSU) |                                                                                        |                                                                        |
| PSU1                     | Uso moltissimo l'ambiente didattico PerLE                                              | Items adapted from Chu and Chen (2016)                                 |
| PSU2                     | Sono motivato ad utilizzare l'ambiente didattico PerLE                                 |                                                                        |
| PSU3                     | Molte delle ore della mia giornata le trascorro utilizzando l'ambiente didattico PerLE |                                                                        |
| PSU4                     | Utilizzare l'ambiente didattico PerLE è un'esperienza gratificante                     |                                                                        |
