# Supplementary material for: PerLE: An “Open Source”, ELearning Moodle-Based, Platform. A Study of University Undergraduates’ Acceptance
Source: MDPI journal article supplement (doi:10.3390/bs8070063), 2018-07-16
Supplement: s1 [file s1]

**PerLE: an open source eLearning Moodle-based platform. A study of university undergraduates' acceptance**

Supplementary data

Reliability of the measured model S1

| Construct                  | Item  | Estimate | S.E. | <i>p</i> | R <sup>2</sup> | Alpha | CR   | AVE  |
|----------------------------|-------|----------|------|----------|----------------|-------|------|------|
| Technical Support (TS)     |       |          |      |          |                | 0.81  | 0.82 | 0.53 |
|                            | TS1   | 0.73     | 0.04 | <.001    | 0.54           |       |      |      |
|                            | TS2   | 0.69     | 0.05 | <.001    | 0.48           |       |      |      |
|                            | TS3   | 0.71     | 0.04 | <.001    | 0.50           |       |      |      |
|                            | TS4   | 0.76     | 0.04 | <.001    | 0.58           |       |      |      |
| PerLE User Interface (PUI) |       |          |      |          |                | 0.90  | 0.90 | 0.61 |
|                            | PUI5  | 0.71     | 0.04 | <.001    | 0.50           |       |      |      |
|                            | PUI6  | 0.73     | 0.04 | <.001    | 0.53           |       |      |      |
|                            | PUI7  | 0.81     | 0.03 | <.001    | 0.65           |       |      |      |
|                            | PUI8  | 0.82     | 0.03 | <.001    | 0.67           |       |      |      |
|                            | PUI9  | 0.80     | 0.03 | <.001    | 0.64           |       |      |      |
|                            | PUI10 | 0.80     | 0.03 | <.001    | 0.65           |       |      |      |
| Online Course Lesson (OCL) |       |          |      |          |                | 0.89  | 0.88 | 0.60 |
|                            | OCL11 | 0.76     | 0.04 | <.001    | 0.58           |       |      |      |
|                            | OCL12 | 0.71     | 0.05 | <.001    | 0.50           |       |      |      |
|                            | OCL13 | 0.73     | 0.05 | <.001    | 0.53           |       |      |      |
|                            | OCL14 | 0.80     | 0.03 | <.001    | 0.64           |       |      |      |
|                            | OCL15 | 0.86     | 0.02 | <.001    | 0.74           |       |      |      |
| PerLE Usefulness (PU)      |       |          |      |          |                | 0.95  | 0.95 | 0.76 |
|                            | PU16  | 0.84     | 0.03 | <.001    | 0.70           |       |      |      |
|                            | PU17  | 0.84     | 0.02 | <.001    | 0.71           |       |      |      |
|                            | PU18  | 0.92     | 0.01 | <.001    | 0.84           |       |      |      |
|                            | PU19  | 0.90     | 0.02 | <.001    | 0.80           |       |      |      |
|                            | PU20  | 0.88     | 0.02 | <.001    | 0.78           |       |      |      |
|                            | PU21  | 0.86     | 0.02 | <.001    | 0.74           |       |      |      |
| PerLE ease of use (PEU)    |       |          |      |          |                | 0.91  | 0.91 | 0.71 |
|                            | PEU22 | 0.80     | 0.03 | <.001    | 0.65           |       |      |      |
|                            | PEU23 | 0.85     | 0.03 | <.001    | 0.72           |       |      |      |
|                            | PEU24 | 0.87     | 0.02 | <.001    | 0.75           |       |      |      |
|                            | PEU25 | 0.85     | 0.03 | <.001    | 0.73           |       |      |      |
| PerLE System Usage (PSU)   |       |          |      |          |                | 0.89  | 0.90 | 0.70 |
|                            | PSU26 | 0.86     | 0.03 | <.001    | 0.75           |       |      |      |
|                            | PSU27 | 0.88     | 0.02 | <.001    | 0.78           |       |      |      |
|                            | PSU28 | 0.73     | 0.03 | <.001    | 0.53           |       |      |      |
|                            | PSU29 | 0.87     | 0.02 | <.001    | 0.76           |       |      |      |

*Note.* CR = Composite reliability and AVE = Average Variance Extracted.
